# Supplementary material
Source: publisher figshare collection journal article supplement (https://gsajournals.figshare.com/ndownloader/files/13184111)
Supplement: Supplementary file 1 [file 13184111]

## Sheet: P_tremula_W52_mito_alltrans...
CDS	Position	P. davidiana	P. alba
atp1	1449	C to A	no
atp4	9	no	T to G
atp6	571	C to A	no
atp8	297	C to A	C to A
atp9		no	no
ccmB		no	no
ccmC		no	no
ccmFc		no	no
ccmFn		no	no
cob		no	no
cox1	5	no	T to G
cox2	666	no	T to G
cox3		no	no
matR	882	no	G to T
matR	883	no	A to C
mttB		no	no
nad1		no	no
nad2	840	no	A to C
nad3	319	A to C	A to C
nad4	247	no	G to T
nad4L		no	no
nad5		no	no
nad6	146	no	C to T	editing site!
nad7		no	no
nad9	549	no	T to G
rpl2		no	no
rpl10	189	T to G	T to G
rpl16		no	no
rps1	621	no	T to G
rps3		no	no
rps4		no	no
rps7		no	no
rps12		no	no
rps14	227	A to C	A to C
sdh4		no	no
